# Supplementary material
Source: MDPI journal article supplement (https://www.mdpi.com/1996-1073/8/5/3739)
Supplement: s1 [file s1]

## Sheet: MeOH-DME
P-xy	MeOH & DME Mixture
VLE 002																				VLE 004
Experimental		Temperature		79.9791	C															Experimental		Temperature		99.9744
No.	Liquid mole fraction METHANOL	Temperature (K)	Vapor mole fraction METHANOL	Total pressure (bar)																No.	Liquid mole fraction METHANOL	Temperature (K)	Vapor mole fraction METHANOL	Total pressure (bar)
1	0	353.129	0	22.43																1	0	373.124	0	32.56
2	0.083	353.129	0.037	20.41																2	0.073	373.124	0.036	30.47
3	0.14	353.129	0.055	19.44																3	0.094	373.124	0.047	29.79
4	0.251	353.129	0.076	18																4	0.18	373.124	0.081	27.58
5	0.35	353.129	0.098	16.55																5	0.238	373.124	0.1	26.2
6	0.443	353.129	0.112	15.17																6	0.314	373.124	0.115	24.82
7	0.546	353.129	0.131	13.44																7	0.368	373.124	0.13	23.51
8	0.637	353.129	0.161	11.72																8	0.429	373.124	0.148	22.06
9	0.706	353.129	0.182	10.27																9	0.494	373.124	0.165	20.75
10	0.73	353.129	0.192	9.72																10	0.56	373.124	0.177	19.24
11	0.771	353.129	0.216	8.76																11	0.598	373.124	0.188	18.2
12	0.833	353.129	0.274	7.17																12	0.648	373.124	0.206	16.69
13	0.842	353.129	0.287	6.89																13	0.739	373.124	0.26	13.93
14	0.867	353.129	0.31	6.21																14	0.784	373.124	0.303	12.41
15	0.877	353.129	0.329	5.65																15	0.823	373.124	0.336	11.17
16	0.919	353.129	0.406	4.34																16	0.838	373.124	0.348	10.48
17	0.947	353.129	0.502	3.52																17	0.881	373.124	0.424	8.69
18	0.979	353.129	0.742	2.69																18	0.922	373.124	0.502	7.17
19	0.986	353.129	0.786	2.21																19	0.948	373.124	0.609	5.79
20	1	353.129	1	1.82																20	0.967	373.124	0.7	5.17
																				21	0.978	373.124	0.772	4.62
																				22	1	373.124	1	3.53
Reference:
	Chang, E.; Calado, J. C. G.; Streett, W. B. J. Vapor-liquid equilibrium in the system dimethyl ether + methanol from 0 to 180 c and at pressures to 6.7 mpa. Chem. Eng. Data 1982, 27, 293-298
PR-BM (Aspen Plus)																				PR-BM (Aspen Plus)
	TOTAL	VAPOR	LIQUID																		TOTAL	VAPOR	LIQUID
	PRES	MOLEFRAC	MOLEFRAC																		PRES	MOLEFRAC	MOLEFRAC
		Methanol	Methanol																			Methanol	Methanol
	bar																				bar
	22.6053	0	0																		33.4604	0	0
	21.0221	0.0168707	0.0666666																		31.0117	0.024391	0.0666666
	19.6149	0.031868	0.133333																		28.868	0.0454261	0.133333
	18.3392	0.0456088	0.2																		26.9384	0.064444	0.2
	17.1608	0.0585668	0.266667																		25.1602	0.0823016	0.266667
	16.0514	0.0711617	0.333333																		23.4867	0.0996663	0.333333
	14.9842	0.0838199	0.4																		21.8795	0.117164	0.4
	13.9338	0.0970406	0.466667																		20.3016	0.13548	0.466667
	12.8731	0.111482	0.533333																		18.7175	0.155486	0.533333
	11.7721	0.128115	0.6																		17.0897	0.178428	0.6
	10.5964	0.148515	0.666667																		15.377	0.206273	0.666667
	9.30535	0.175546	0.733333																		13.5328	0.242462	0.733333
	7.84966	0.21512	0.8																		11.5031	0.293776	0.8
	6.16954	0.281965	0.866667																		9.22466	0.375872	0.866667
	4.19196	0.426146	0.933333																		6.62324	0.535263	0.933333
	1.82791	1	1																		3.61128	1	1
Ethylene Package (Aspen Plus)																				Ethylene Package (Aspen Plus)
	TOTAL	VAPOR	LIQUID																		TOTAL	VAPOR	LIQUID
	PRES	MOLEFRAC	MOLEFRAC																		PRES	MOLEFRAC	MOLEFRAC
		METHANOL	METHANOL																			METHANOL	METHANOL
	bar																				bar
	22.5238	0	0																		33.3946	0	0
	21.919	0.00659442	0.025																		32.4509	0.0095934	0.025
	21.3407	0.0128532	0.05																		31.5539	0.0185348	0.05
	20.7871	0.0188204	0.075																		30.7047	0.0269439	0.075
	20.2568	0.0245346	0.1																		29.9015	0.0349159	0.1
	19.7512	0.0300321	0.125																		29.1254	0.042516	0.125
	19.2591	0.0353355	0.15																		28.3802	0.0498086	0.15
	18.784	0.0404752	0.175																		27.6623	0.0568448	0.175
	18.3243	0.04548	0.2																		26.9685	0.0636692	0.2
	17.8749	0.0503607	0.225																		26.2957	0.0703213	0.225
	17.4441	0.0551519	0.25																		25.646	0.076844	0.25
	17.0208	0.0598711	0.275																		25.0056	0.0832548	0.275
	16.6067	0.0645395	0.3																		24.3794	0.0895957	0.3
	16.2005	0.0691788	0.325																		23.7654	0.0958988	0.325
	15.804	0.0738196	0.35																		23.1615	0.102196	0.35
	15.4095	0.0784705	0.375																		22.5656	0.108521	0.375
	15.0186	0.0831633	0.4																		21.9808	0.114919	0.4
	14.63	0.0879254	0.425																		21.3959	0.121407	0.425
	14.2423	0.0927872	0.45																		20.813	0.128033	0.45
	13.8539	0.0977826	0.475																		20.2302	0.134843	0.475
	13.4636	0.102951	0.5																		19.6454	0.141887	0.5
	13.0695	0.108336	0.525																		19.0568	0.149222	0.525
	12.6702	0.113991	0.55																		18.462	0.156916	0.55
	12.2639	0.11998	0.575																		17.8591	0.165047	0.575
	11.8486	0.126377	0.6																		17.2457	0.173709	0.6
	11.4225	0.133276	0.625																		16.6194	0.183018	0.625
	10.9834	0.140791	0.65																		15.9777	0.193113	0.65
	10.529	0.149067	0.675																		15.318	0.20417	0.675
	10.057	0.158293	0.7																		14.6374	0.216409	0.7
	9.56308	0.168697	0.725																		13.9329	0.230118	0.725
	9.04791	0.180636	0.75																		13.2014	0.245671	0.75
	8.50656	0.194544	0.775																		12.4396	0.263572	0.775
	7.93573	0.211051	0.8																		11.6417	0.284497	0.8
	7.33184	0.231078	0.825																		10.8085	0.309466	0.825
	6.69103	0.256023	0.85																		9.9332	0.3399	0.85
	6.00913	0.288116	0.875																		9.01158	0.377996	0.875
	5.28164	0.331151	0.9																		8.03889	0.427293	0.9
	4.50368	0.392142	0.925																		7.01014	0.493868	0.925
	3.67002	0.485681	0.95																		5.92004	0.589117	0.95
	2.775	0.647942	0.975																		4.76284	0.737224	0.975
	1.81255	1	1																		3.53273	1	1

## Sheet: MeOH-EtOH
P-xy	MeOH & EtOH Mixture
Experimental		Temperature		24.9944	C
No.	Liquid mole fraction ETHANOL	Temperature (K)	Vapor mole fraction ETHANOL	Total pressure (bar)
1	0	298.144	0	0.16916
2	0.0344	298.144	0.0164	0.16604
3	0.1697	298.144	0.0869	0.15365
4	0.2704	298.144	0.1472	0.14442
5	0.3563	298.144	0.2051	0.13657
6	0.3794	298.144	0.2218	0.13451
7	0.4346	298.144	0.264	0.12937
8	0.4437	298.144	0.2712	0.12861
9	0.5157	298.144	0.3322	0.12204
10	0.5865	298.144	0.3989	0.11557
11	0.6121	298.144	0.4248	0.11316
12	0.689	298.144	0.5097	0.10628
13	0.7436	298.144	0.577	0.10131
14	0.8871	298.144	0.7888	0.08842
15	0.9569	298.144	0.914	0.0823
16	1	298.144	1	0.07859
Reference:
	Kooner, Z. S.; Fenby, D. V. Vapor pressure study of the deuterium exchange reaction in methanol + ethanol systems. equilibrium constant determination. Aust. J. Chem 1980, 33, 1943-1946.
PR-BM (Aspen Plus)
	TOTAL	VAPOR	LIQUID
	PRES	MOLEFRAC	MOLEFRAC
		EtOH	EtOH
	bar
	0.080836	1	1
	0.0865813	0.871828	0.933333
	0.0921942	0.761085	0.866667
	0.097677	0.66425	0.8
	0.103032	0.578662	0.733333
	0.108264	0.502271	0.666667
	0.113375	0.433463	0.6
	0.118371	0.370948	0.533333
	0.123256	0.313678	0.466667
	0.128037	0.260781	0.4
	0.132721	0.211525	0.333333
	0.137316	0.165278	0.266667
	0.14183	0.121486	0.2
	0.146274	0.0796485	0.133333
	0.150659	0.0393011	0.0666666
	0.154997	0	0
Ethylene Package (Aspen Plus)
	TOTAL	VAPOR	LIQUID
	PRES	MOLEFRAC	MOLEFRAC
		ETHANOL	ETHANOL
	bar
	0.168389	0	0
	0.166721	0.015041	0.025
	0.165033	0.0298434	0.05
	0.163327	0.0444698	0.075
	0.161601	0.0589785	0.1
	0.159855	0.0734244	0.125
	0.158087	0.0878596	0.15
	0.156297	0.102334	0.175
	0.154483	0.116895	0.2
	0.152644	0.131591	0.225
	0.150779	0.146468	0.25
	0.148886	0.16157	0.275
	0.146965	0.176945	0.3
	0.145013	0.192639	0.325
	0.143031	0.208698	0.35
	0.141016	0.225172	0.375
	0.138969	0.24211	0.4
	0.136889	0.259564	0.425
	0.134773	0.277588	0.45
	0.132623	0.296239	0.475
	0.130438	0.315577	0.5
	0.128217	0.335667	0.525
	0.125959	0.356576	0.55
	0.123665	0.378378	0.575
	0.121336	0.401151	0.6
	0.11897	0.424979	0.625
	0.116568	0.449955	0.65
	0.114131	0.476179	0.675
	0.111658	0.503759	0.7
	0.109152	0.532815	0.725
	0.106611	0.563479	0.75
	0.104038	0.595894	0.775
	0.101433	0.63022	0.8
	0.0987969	0.666635	0.825
	0.0961314	0.705336	0.85
	0.0934376	0.746543	0.875
	0.090717	0.790503	0.9
	0.087971	0.837493	0.925
	0.0852012	0.887827	0.95
	0.0824095	0.941861	0.975
	0.0795976	1	1

## Sheet: DME-EtOH
P-xy	DME & EtOH Mixture
Experimental		Temperature		80.1	C
No.	Liquid mole fraction ETHANOL	Temperature (K)	Vapor mole fraction ETHANOL	Total pressure (bar)
1	0.3641	353.25	0.0573	14.46
2	0.4088	353.25	0.0622	13.61
3	0.4258	353.25	0.0647	13.3
4	0.5151	353.25	0.0762	11.55
5	0.5506	353.25	0.0816	10.84
6	0.6003	353.25	0.0898	9.81
7	0.6824	353.25	0.1126	8.09
Reference:
	Elbaccouch, M. M.; Elliott, J. R. J. High-Pressure Vapor-Liquid Equilibrium for Dimethyl Ether + Ethanol and Dimethyl Ether + Ethanol + Water. Chem. Eng. Data 2000, 45, 1080-1087 .
PR-BM (Aspen Plus)
	TOTAL	VAPOR	LIQUID
	PRES	MOLEFRAC	MOLEFRAC
		EtOH	EtOH
	bar
	22.6618	0	0
	20.8695	0.00996192	0.0666666
	19.3043	0.0186836	0.133333
	17.8825	0.0268142	0.2
	16.5505	0.0347977	0.266667
	15.2717	0.0430103	0.333333
	14.0173	0.0518326	0.4
	12.7656	0.0617234	0.466667
	11.4985	0.0733077	0.533333
	10.2006	0.0875308	0.6
	8.85872	0.105962	0.666667
	7.46119	0.131489	0.733333
	5.99761	0.17014	0.8
	4.45866	0.23709	0.866667
	2.83592	0.384768	0.933333
	1.12181	1	1
Ethylene Package (Aspen Plus)
	TOTAL	VAPOR	LIQUID
	PRES	MOLEFRAC	MOLEFRAC
		ETHANOL	ETHANOL
	bar
	22.5803	0	0
	21.8878	0.0038961	0.025
	21.2343	0.00753355	0.05
	20.6149	0.0109665	0.075
	20.0249	0.0142388	0.1
	19.4597	0.0173858	0.125
	18.9177	0.0204398	0.15
	18.39	0.0234207	0.175
	17.8774	0.0263547	0.2
	17.376	0.0292653	0.225
	16.888	0.032165	0.25
	16.407	0.0350801	0.275
	15.9327	0.0380268	0.3
	15.4635	0.0410241	0.325
	14.9981	0.0440918	0.35
	14.5349	0.0472507	0.375
	14.073	0.0505234	0.4
	13.611	0.0539349	0.425
	13.1479	0.0575129	0.45
	12.6828	0.0612891	0.475
	12.2146	0.0653002	0.5
	11.7426	0.0695889	0.525
	11.2658	0.0742056	0.55
	10.7835	0.0792114	0.575
	10.2949	0.0846798	0.6
	9.79915	0.090702	0.625
	9.2957	0.0973916	0.65
	8.7838	0.104893	0.675
	8.26282	0.113392	0.7
	7.73212	0.123134	0.725
	7.1911	0.134447	0.75
	6.63916	0.147785	0.775
	6.07575	0.163788	0.8
	5.50031	0.183396	0.825
	4.91231	0.208044	0.85
	4.31125	0.24004	0.875
	3.69662	0.283342	0.9
	3.06794	0.345372	0.925
	2.42475	0.441841	0.95
	1.76661	0.612834	0.975
	1.09307	1	1

## Sheet: Ethane-Ethylene
P-xy	Ethane & Ethylene Mixture
Experimental		Temperature		-17.77	C															Experimental		Temperature		-111.75	C
VLE 013	Liquid Mole fraction ETHANE	Temperature (K)	Vapor Mole fraction ETHANE	Total pressure(bar)																VLE 038	Liquid Mole fraction ETHANE	Temperature (K)	Vapor Mole fraction ETHANE	Total pressure(bar)
1	0	255.38	0	26.648																1	0	161.4	0	0.6168
2	0.0315	255.38	0.023	26.269																2	0.2056	161.4	0.1071	0.5544
3	0.111	255.38	0.083	25.407																3	0.3022	161.4	0.1597	0.5242
4	0.351	255.38	0.271	22.753																4	0.446	161.4	0.246	0.4768
5	0.364	255.38	0.291	22.546																5	0.4673	161.4	0.26	0.4695
6	0.573	255.38	0.475	20.167																6	0.4888	161.4	0.2745	0.4622
7	0.662	255.38	0.564	19.236																7	0.6021	161.4	0.3597	0.4212
8	0.829	255.38	0.757	17.168																8	0.7145	161.4	0.465	0.3769
9	0.907	255.38	0.859	16.203																9	0.7745	161.4	0.5333	0.3522
10	0.9665	255.38	0.95	15.548																10	1	161.4	1	0.2367
11	1	255.38	1	15.134
Reference:																				Reference:
	Hanson, G. H.; Hogan, R. J.; Ruehlen, F. N.; Cines, M. R. Ethane - ethylene system vapor-liquid equilibria at 0°, -40°, and -100°F Chem. Eng. Prog. Symp. Ser. 1953, 49, 37.																				Calado, J. C. G.; Gomes de Azevedo, E. J. S.; Clancy, P.; Gubbins, K. E. J. Chem. Soc., Faraday Trans. 1, 1983, 79, 2657-67 Thermodynamic study of liquid mixtures of ethane and ethene
PR-BM (Aspen Plus)																				PR-BM (Aspen Plus)
	TOTAL	VAPOR	LIQUID																		TOTAL	VAPOR	LIQUID
	PRES	MOLEFRAC	MOLEFRAC																		PRES	MOLEFRAC	MOLEFRAC
		C2H6	C2H6																			C2H6	C2H6
	bar																				bar
	26.8869	0	0																		0.632386	0	0
	25.9415	0.052	0.0714285																		0.60419	0.0291343	0.0714285
	25.0226	0.105577	0.142857																		0.576091	0.0610056	0.142857
	24.1274	0.161022	0.214286																		0.548041	0.0960318	0.214286
	23.2428	0.218599	0.285714																		0.520034	0.13472	0.285714
	22.3752	0.278633	0.357143																		0.492069	0.177692	0.357143
	21.5235	0.341462	0.428571																		0.464142	0.225717	0.428571
	20.6864	0.407454	0.5																		0.436251	0.279758	0.5
	19.863	0.477017	0.571429																		0.408392	0.341043	0.571429
	19.0523	0.550611	0.642857																		0.380565	0.411153	0.642857
	18.2537	0.62875	0.714286																		0.352765	0.492165	0.714286
	17.4664	0.712025	0.785714																		0.324993	0.586864	0.785714
	16.6898	0.801113	0.857143																		0.297245	0.69907	0.857143
	15.9233	0.896799	0.928571																		0.269521	0.834167	0.928571
	15.166	1	1																		0.241812	1	1
Ethylene Package (Aspen Plus)																				Ethylene Package (Aspen Plus)
	TOTAL	VAPOR	LIQUID																		TOTAL	VAPOR	LIQUID
	PRES	MOLEFRAC	MOLEFRAC																		PRES	MOLEFRAC	MOLEFRAC
		C2H6	C2H6																			C2H6	C2H6
	bar																				bar
	26.9275	0	0																		0.61915	0	0
	25.9932	0.05202	0.0714285																		0.590814	0.0279221	0.0714285
	25.0836	0.105624	0.142857																		0.562582	0.0585371	0.142857
	24.1966	0.161102	0.214286																		0.534396	0.0922707	0.214286
	23.32	0.218714	0.285714																		0.506254	0.129642	0.285714
	22.4596	0.278785	0.357143																		0.478151	0.171292	0.357143
	21.6143	0.341649	0.428571																		0.450083	0.218018	0.428571
	20.7829	0.407671	0.5																		0.422047	0.27083	0.5
	19.9645	0.477259	0.571429																		0.394039	0.331025	0.571429
	19.1582	0.550865	0.642857																		0.366057	0.400291	0.642857
	18.3633	0.629004	0.714286																		0.338097	0.480875	0.714286
	17.5792	0.71226	0.785714																		0.310157	0.575832	0.785714
	16.8052	0.801304	0.857143																		0.282235	0.689419	0.857143
	16.0409	0.896915	0.928571																		0.254329	0.827763	0.928571
	15.2853	1	1																		0.22643	1	1

## Sheet: Methane-Ethane
P-xy	Methane & Ethane Mixture
Experimental		Temperature		-101.14	C
VLE 013	Liquid Mole fraction METHANE	Temperature (K)	Vapor Mole fraction METHANE	Total pressure(bar)
1	0	172.01	0	0.48946
2	0.0685	172.01	0.7681	2.1236
3	0.07	172.01	0.7768	2.2063
4	0.1087	172.01	0.8469	3.1371
5	0.205	172.01	0.9161	5.5847
6	0.2626	172.01	0.9322	6.8948
7	0.3164	172.01	0.9434	8.2737
8	0.5042	172.01	0.9656	12.411
9	0.5708	172.01	0.9704	13.79
10	0.7082	172.01	0.9788	17.065
11	0.8609	172.01	0.9878	20.615
12	0.8673	172.01	0.9887	20.684
13	0.9175	172.01	0.99209	22.339
14	0.9513	172.01	0.99531	23.408
15	1	172.01	1	24.925
Reference:
	Wichterle, I.; Kobayashi, R. Low Temperature VLE , 1970, Monograph, Rice University, Houston,
PR-BM (Aspen Plus)
	TOTAL	VAPOR	LIQUID
	PRES	MOLEFRAC	MOLEFRAC
		CH4	CH4
	bar
	0.492539	0	0
	2.22388	0.781693	0.0714285
	3.94454	0.87931	0.142857
	5.65232	0.917714	0.214286
	7.34543	0.9384	0.285714
	9.0227	0.951464	0.357143
	10.6827	0.960595	0.428571
	12.3289	0.967447	0.5
	13.9648	0.972909	0.571429
	15.5995	0.977503	0.642857
	17.2507	0.981583	0.714286
	18.9433	0.985445	0.785714
	20.7361	0.989388	0.857143
	22.7427	0.993875	0.928571
	25.2209	1	1
Ethylene Package (Aspen Plus)
	TOTAL	VAPOR	LIQUID
	PRES	MOLEFRAC	MOLEFRAC
		CH4	CH4
	bar
	0.469944	0	0
	2.2715	0.795874	0.0714285
	4.05233	0.88769	0.142857
	5.80988	0.923389	0.214286
	7.5421	0.942524	0.285714
	9.24651	0.954589	0.357143
	10.9246	0.962999	0.428571
	12.5775	0.969315	0.5
	14.2102	0.974356	0.571429
	15.8324	0.978608	0.642857
	17.4621	0.982402	0.714286
	19.1325	0.98601	0.785714
	20.8954	0.989736	0.857143
	22.8736	0.994031	0.928571
	25.3312	1	1

## Sheet: Methane-Ethylene
P-xy	Methane & Ethylene Mixture
Experimental		Temperature		-123.14	C															Experimental		Temperature		-103.14	C
VLE 007	Liquid Mole fraction METHANE	Temperature (K)	Vapor Mole fraction METHANE	Total pressure(bar)																VLE 038	Liquid Mole fraction METHANE	Temperature (K)	Vapor Mole fraction METHANE	Total pressure(bar)
1	0	150.01	0	0.276																1	0	170.01	0	1.057
2	0.0848	150.01	0.8338	1.547																2	0.0328	170.01	0.4815	2.028
3	0.1273	150.01	0.8783	2.039																3	0.1105	170.01	0.7463	4.038
4	0.209	150.01	0.9244	3.035																4	0.1951	170.01	0.8372	6.034
5	0.2896	150.01	0.9455	3.95																5	0.2811	170.01	0.8842	8
6	0.4043	150.01	0.9627	5.022																6	0.3778	170.01	0.9128	10.01
7	0.5118	150.01	0.972	5.991																7	0.4872	170.01	0.9339	12.17
8	0.6327	150.01	0.979	7.02																8	0.5859	170.01	0.9489	14.07
9	0.758	150.01	0.9859	8.03																9	0.6897	170.01	0.9612	16.01
10	0.8724	150.01	0.9927	9.03																10	0.7891	170.01	0.9728	18
																				11	0.7908	170.01	0.974	18.03
																				12	0.8797	170.01	0.984	19.96
Reference:																				Reference:
	Miller, R. C.; Kidnay, A. J.; Hiza, M. J. Liquid + Vapor equilibria in methane + ethene and in methane + ethane from 150.00 to 190.00 K J. Chem. Thermodyn. 1977, 9, 167-178.																				Miller, R. C.; Kidnay, A. J.; Hiza, M. J. Liquid + Vapor equilibria in methane + ethene and in methane + ethane from 150.00 to 190.00 K. J. Chem. Thermodyn. 1977, 9, 167-178.
PR-BM (Aspen Plus)																				PR-BM (Aspen Plus)
	TOTAL	VAPOR	LIQUID																		TOTAL	VAPOR	LIQUID
	PRES	MOLEFRAC	MOLEFRAC																		PRES	MOLEFRAC	MOLEFRAC
		CH4	CH4																			CH4	CH4
	bar																				bar
	0.285617	0	0																		1.06797	0	0
	1.06432	0.742902	0.0714285																		2.61199	0.601842	0.0714285
	1.8264	0.857222	0.142857																		4.14349	0.756871	0.142857
	2.57209	0.903853	0.214286																		5.66236	0.828427	0.214286
	3.30185	0.929387	0.285714																		7.16932	0.869973	0.285714
	4.01663	0.94566	0.357143																		8.66588	0.897405	0.357143
	4.71792	0.957075	0.428571																		10.1547	0.917131	0.428571
	5.40797	0.96565	0.5																		11.6403	0.932249	0.5
	6.09002	0.972448	0.571429																		13.1293	0.944454	0.571429
	6.76866	0.97809	0.642857																		14.6321	0.954781	0.642857
	7.45033	0.982974	0.714286																		16.168	0.963918	0.714286
	8.14418	0.987384	0.785714																		17.7589	0.972415	0.785714
	8.86343	0.991544	0.857143																		19.4473	0.980776	0.857143
	9.62948	0.995666	0.928571																		21.3095	0.989615	0.928571
	10.4728	1	1																		23.4832	1	1
Ethylene Package (Aspen Plus)																				Ethylene Package (Aspen Plus)
	TOTAL	VAPOR	LIQUID																		TOTAL	VAPOR	LIQUID
	PRES	MOLEFRAC	MOLEFRAC																		PRES	MOLEFRAC	MOLEFRAC
		CH4	CH4																			CH4	CH4
	bar																				bar
	0.274952	0	0																		1.05476	0	0
	1.07124	0.754095	0.0714285																		2.64569	0.611657	0.0714285
	1.84728	0.864067	0.142857																		4.21689	0.763933	0.142857
	2.60335	0.908505	0.214286																		5.76835	0.833528	0.214286
	3.34013	0.932743	0.285714																		7.3009	0.873752	0.285714
	4.05877	0.948162	0.357143																		8.81624	0.900248	0.357143
	4.76105	0.958971	0.428571																		10.3174	0.919281	0.428571
	5.44951	0.967093	0.5																		11.8092	0.933867	0.5
	6.12699	0.973544	0.571429																		13.2989	0.945654	0.571429
	6.79991	0.978904	0.642857																		14.7976	0.955645	0.642857
	7.47469	0.983559	0.714286																		16.3239	0.964513	0.714286
	8.16186	0.987776	0.785714																		17.9033	0.972791	0.785714
	8.8737	0.991779	0.857143																		19.5784	0.980977	0.857143
	9.63183	0.995771	0.928571																		21.4265	0.989688	0.928571
	10.4675	1	1																		23.5869	1	1

## Sheet: Ethane-Propylene
P-xy	Ethane & Propylene Mixture
Experimental		Temperature		-71.3892	C
No.	Liquid mole fraction ETHANE	Temperature (K)	Vapor mole fraction ETHANE	Total pressure bar
1	0	201.761	0	0.29864
2	0.024	201.761	0.154	0.3733
3	0.145	201.761	0.541	0.60795
4	0.21	201.761	0.662	0.77594
5	0.292	201.761	0.74	0.93459
6	0.364	201.761	0.788	1.08791
7	0.421	201.761	0.834	1.18124
8	0.525	201.761	0.888	1.41455
9	0.676	201.761	0.934	1.69986
10	0.783	201.761	0.962	1.92384
11	0.915	201.761	0.986	2.18382
12	1	201.761	1	2.36114
Reference:
	Hirata, M.; Suda, S.; Hakuta, T.; Nagahama, K. Light hydrocarbon vapor-liquid equilibria.Mem. Fac. Technol., Tokyo Metrop. Univ., 1969, 19, 103-122
PR-BM (Aspen Plus)
	TOTAL	VAPOR	LIQUID
	PRES	MOLEFRAC	MOLEFRAC
		Ethane	Ethane
	bar
	0.313963	0	0
	0.462512	0.362072	0.0666666
	0.607815	0.545806	0.133333
	0.750105	0.657363	0.2
	0.889645	0.732627	0.266667
	1.02672	0.787106	0.333333
	1.16166	0.828598	0.4
	1.29482	0.861456	0.466667
	1.42658	0.888305	0.533333
	1.55739	0.910826	0.6
	1.68774	0.930144	0.666667
	1.81815	0.947047	0.733333
	1.94924	0.962106	0.8
	2.08168	0.975744	0.866667
	2.21621	0.988289	0.933333
	2.35369	1	1
Ethylene Package (Aspen Plus)
	TOTAL	VAPOR	LIQUID
	PRES	MOLEFRAC	MOLEFRAC
		ETHAN-01	ETHAN-01
	bar
	2.32298	1	1
	2.27039	0.996217	0.975
	2.21826	0.992289	0.95
	2.16606	0.988209	0.925
	2.11407	0.983962	0.9
	2.06227	0.979536	0.875
	2.01065	0.974916	0.85
	1.9592	0.970087	0.825
	1.9079	0.965031	0.8
	1.85675	0.95973	0.775
	1.80573	0.954161	0.75
	1.75483	0.948301	0.725
	1.70405	0.942124	0.7
	1.65337	0.9356	0.675
	1.60279	0.928695	0.65
	1.5523	0.921374	0.625
	1.50189	0.913593	0.6
	1.45156	0.905304	0.575
	1.4013	0.896452	0.55
	1.35111	0.886975	0.525
	1.30098	0.8768	0.5
	1.2509	0.865843	0.475
	1.20087	0.854007	0.45
	1.15089	0.841176	0.425
	1.10095	0.827215	0.4
	1.05105	0.811964	0.375
	1.00119	0.79523	0.35
	0.951357	0.77678	0.325
	0.901556	0.75633	0.3
	0.851783	0.733529	0.275
	0.802034	0.707941	0.25
	0.752307	0.679013	0.225
	0.702601	0.646038	0.2
	0.652913	0.608092	0.175
	0.603242	0.563948	0.15
	0.553585	0.511941	0.125
	0.503942	0.449749	0.1
	0.454311	0.374038	0.075
	0.404691	0.27984	0.05
	0.355079	0.159415	0.025
	0.305464	0	0

## Sheet: H2-Ethylene
P-xy	H2 & Ethylene Mixture
Experimental		Temperature		-73.3	C
VLE 013	Liquid Mole fraction ETHYLENE	Temperature (K)	Vapor Mole fraction ETHYLENE	Total pressure(bar)
1	0.6922	199.85	0.1023	551.58
2	0.6922	199.85	0.1022	551.58
3	0.8378	199.85	0.0754	275.79
4	0.8385	199.85	0.0737	275.79
5	0.8387	199.85	0.074	275.79
6	0.841	199.85	0.0729	275.79
7	0.915	199.85	0.0859	137.9
8	0.9153	199.85	0.0824	137.9
9	0.9154	199.85	0.0852	137.9
10	0.9579	199.85	0.1144	68.948
11	0.958	199.85	0.117	68.948
12	0.9587	199.85	0.1158	68.948
13	0.959	199.85	0.1155	68.948
14	0.9799	199.85	0.1862	34.474
15	0.9802	199.85	0.1846	34.474
16	0.9804	199.85	0.186	34.474
17	0.9806	199.85	0.1849	34.474
18	0.9915	199.85	0.3182	17.237
19	0.9919	199.85	0.3186	17.237
20	0.9921	199.85	0.3174	17.237
21	0.9926	199.85	0.317	17.237
Reference:
	Williams, R. B.; Katz, D. L. Hydrogen with ethylene, ethane, propylene, and propane. Ind. Eng. Chem. 1954, 46, 2512
PR-BM (Aspen Plus)
	TOTAL	VAPOR	LIQUID
	PRES	MOLEFRAC	MOLEFRAC
		C2H4	C2H4
	bar
	547.375	0.142602	0.6
	506.211	0.133913	0.625
	466.682	0.12652	0.65
	427.63	0.11954	0.675
	389.384	0.113235	0.7
	351.992	0.107549	0.725
	315.515	0.102498	0.75
	279.998	0.0981404	0.775
	245.469	0.0945858	0.8
	211.937	0.092009	0.825
	179.414	0.0907368	0.85
	147.882	0.0913057	0.875
	117.331	0.0948178	0.9
	87.7418	0.103757	0.925
	59.0947	0.125167	0.95
	31.3653	0.189891	0.975
	4.53194	1	1
Ethylene Package (Aspen Plus)
	TOTAL	VAPOR	LIQUID
	PRES	MOLEFRAC	MOLEFRAC
		C2H4	C2H4
	bar
	771.738	0.0976166	0.642857
	549.202	0.0843205	0.714286
	372.103	0.0748809	0.785714
	227.51	0.0712563	0.857143
	107.007	0.0846053	0.928571
	4.53852	1	1

## Sheet: H2-CO
P-xy	H2 & CO Mixture
Experimental		Temperature		-148.14	C
VLE 013	Liquid Mole fraction CO	Temperature (K)	Vapor Mole fraction CO	Total pressure(bar)
	0.9406	125.01	0.787	39.5
	0.9539	125.01	0.814	36.3
	0.967	125.01	0.8513	33
	0.9783	125.01	0.8935	29.8
Reference:
	Tsang, C. Y.; Streett, W. B. Phase equilibria in the H(2) + CO system at temperatures from 70 to 125 k and pressures to 53 mpa.Fluid Phase Equilib. 1981, 6, 261-273.
PR-BM (Aspen Plus)
	TOTAL	VAPOR	LIQUID
	PRES	MOLEFRAC	MOLEFRAC
		CO	CO
	bar
	40.3414	0.784837	0.914286
	38.5212	0.797931	0.925
	36.6349	0.813707	0.935714
	34.711	0.832729	0.946429
	32.7192	0.855331	0.957143
	30.6813	0.882355	0.967857
	28.5858	0.914593	0.978571
	26.4331	0.953262	0.989286
	24.2345	1	1
Ethylene Package (Aspen Plus)
	TOTAL	VAPOR	LIQUID
	PRES	MOLEFRAC	MOLEFRAC
		CO	CO
	bar
	43.4549	0.75765	0.9175
	42.2693	0.765017	0.923
	41.0922	0.773357	0.9285
	39.8967	0.782529	0.934
	38.6828	0.792604	0.9395
	37.4351	0.803573	0.945
	36.1914	0.815757	0.9505
	34.9284	0.829124	0.956
	33.6422	0.843806	0.9615
	32.3481	0.859981	0.967
	31.0364	0.877792	0.9725
	29.7078	0.897445	0.978
	28.3551	0.919134	0.9835
	26.9937	0.943242	0.989
	25.6182	0.970063	0.9945
	24.225	1	1

## Sheet: CO-Ethane
P-xy	CO & Ethane Mixture
Experimental		Temperature		-99.99	C
VLE 001	Liquid Mole fraction ETHANE	Temperature (K)	Vapor Mole fraction ETHANE	Total pressure(bar)
1	0.172	173.16	0.117	93.079
2	0.431	173.16	0.0543	82.737
3	0.572	173.16	0.0273	68.948
4	0.814	173.16	0.0216	34.474
5	0.9304	173.16	0.0341	13.79
Reference:
	Trust, D. B.; Kurata, F.Vapor-liquid and liquid-liquid vapor phase behavior of the carbon monoxide - propane and the carbon monoxide - ethane systems. AIChE J. 1971, 17, 415-419.
PR-BM (Aspen Plus)
	TOTAL	VAPOR	LIQUID
	PRES	MOLEFRAC	MOLEFRAC
		C2H6	C2H6
	bar
	86.9472	0.0701349	0.475
	83.0586	0.0628879	0.5
	79.0891	0.0567011	0.525
	75.0476	0.0514771	0.55
	70.9552	0.0470734	0.575
	66.8264	0.0433959	0.6
	62.6722	0.0403585	0.625
	58.5008	0.0378881	0.65
	54.3186	0.0359276	0.675
	50.1305	0.034429	0.7
	45.9442	0.0333829	0.725
	41.7588	0.0327757	0.75
	37.5788	0.0326357	0.775
	33.4068	0.0330246	0.8
	29.2449	0.034062	0.825
	25.095	0.0359671	0.85
	20.9587	0.0391505	0.875
	16.8376	0.0444417	0.9
	12.7326	0.0537453	0.925
	8.64584	0.0725971	0.95
	4.57758	0.126068	0.975
	0.528975	1	1
Ethylene Package (Aspen Plus)
	TOTAL	VAPOR	LIQUID
	PRES	MOLEFRAC	MOLEFRAC
		C2H6	C2H6
	bar
	92.4716	0.072271	0.5
	79.8724	0.051972	0.571429
	66.8347	0.0397077	0.642857
	53.6134	0.0330237	0.714286
	40.3231	0.0305766	0.785714
	27.015	0.0329808	0.857143
	13.7329	0.0483924	0.928571
	0.505608	1	1

[truncated: 1 more sheets: Ethylene-CO]
